# Supplementary material for: In situ investigation on Co-phase evolution and its performance for Fischer–Tropsch synthesis over Nb-promoted cobalt catalysts
Source: Royal Society of Chemistry journal article supplement (doi:10.1039/c7cy01325f), 2017-01-01
Supplement: c7cy01325f1.pdf [file c7cy01325f1.pdf]

## Electronic Supplementary Information

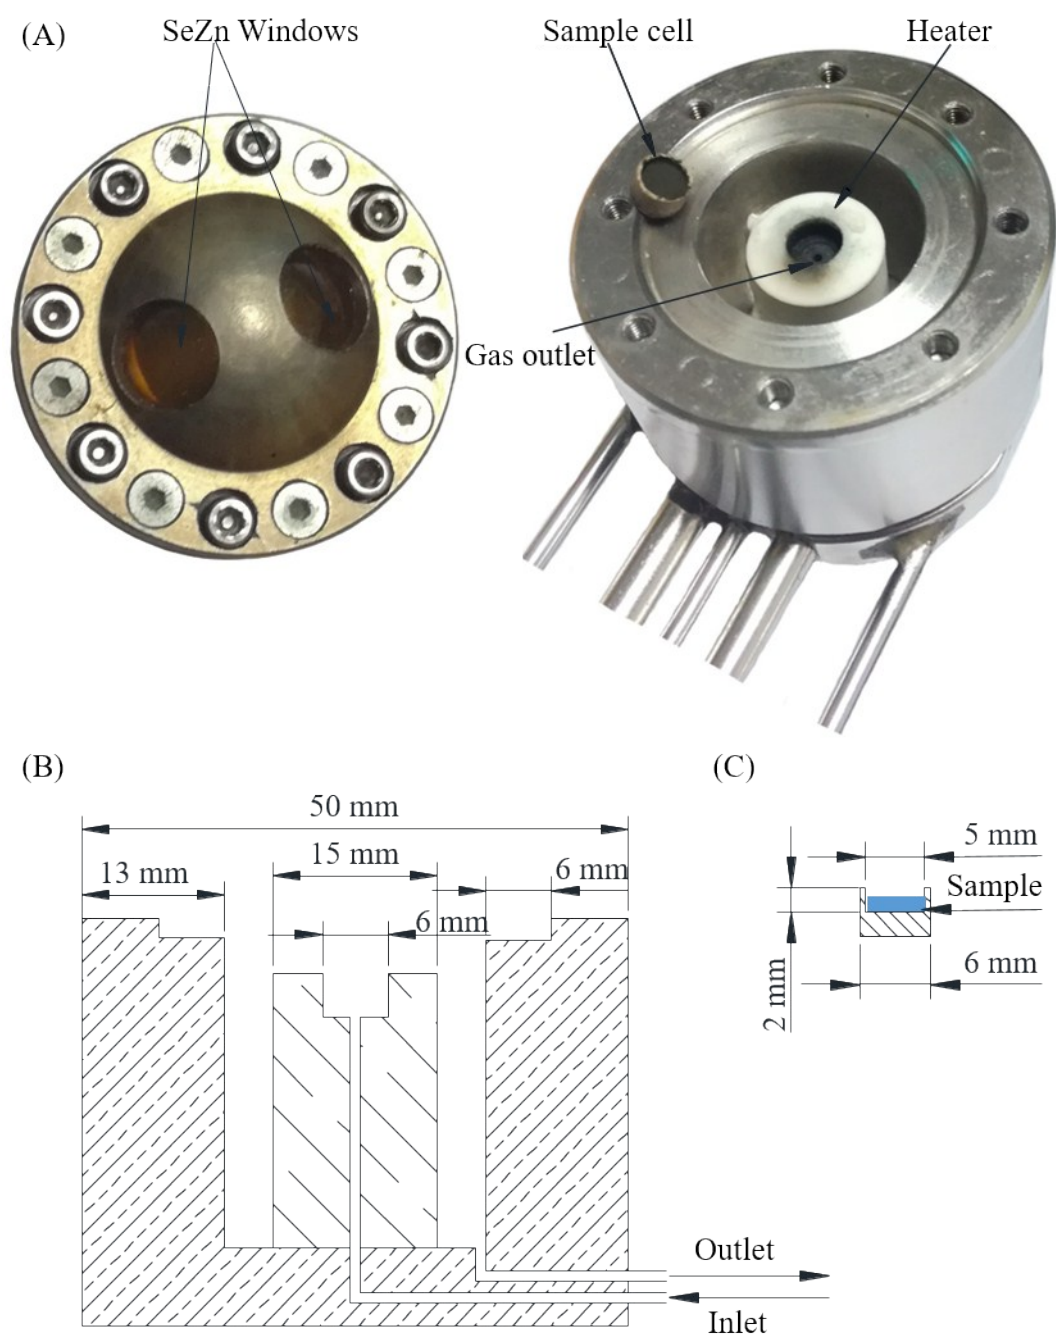

Fig. S1. Image of high temperature DRIFTS reactor cell (A), schematic representation of high temperature DRIFTS cell (B) and sample cell (C).

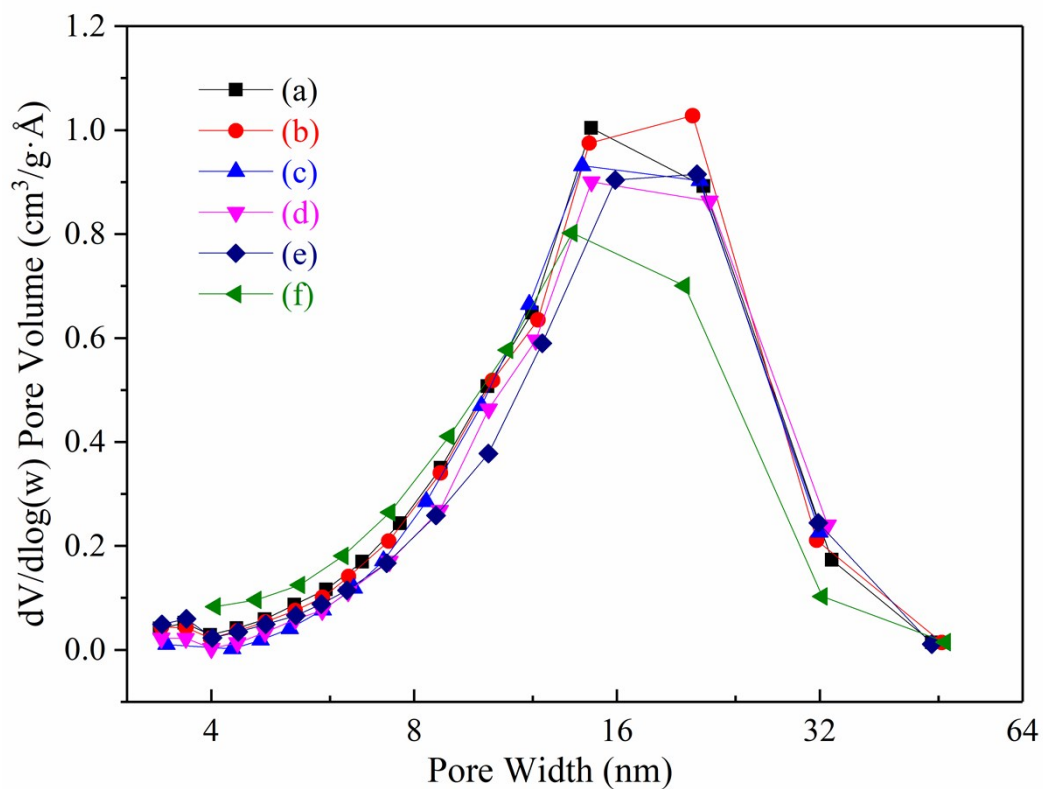

Fig. S2. The pore size distributions of fresh catalysts: (a) Co/Si, (b) Co/NbSi-1, (c) Co/NbSi-2, (d) Co/NbSi-3, (e) Co/NbSi-4, and (f) Co/NbSi-5. It is clear that a pore size distribution around 6~48 nm was observed for each catalyst sample, while the average pore sizes of the samples are approximately 14 nm.

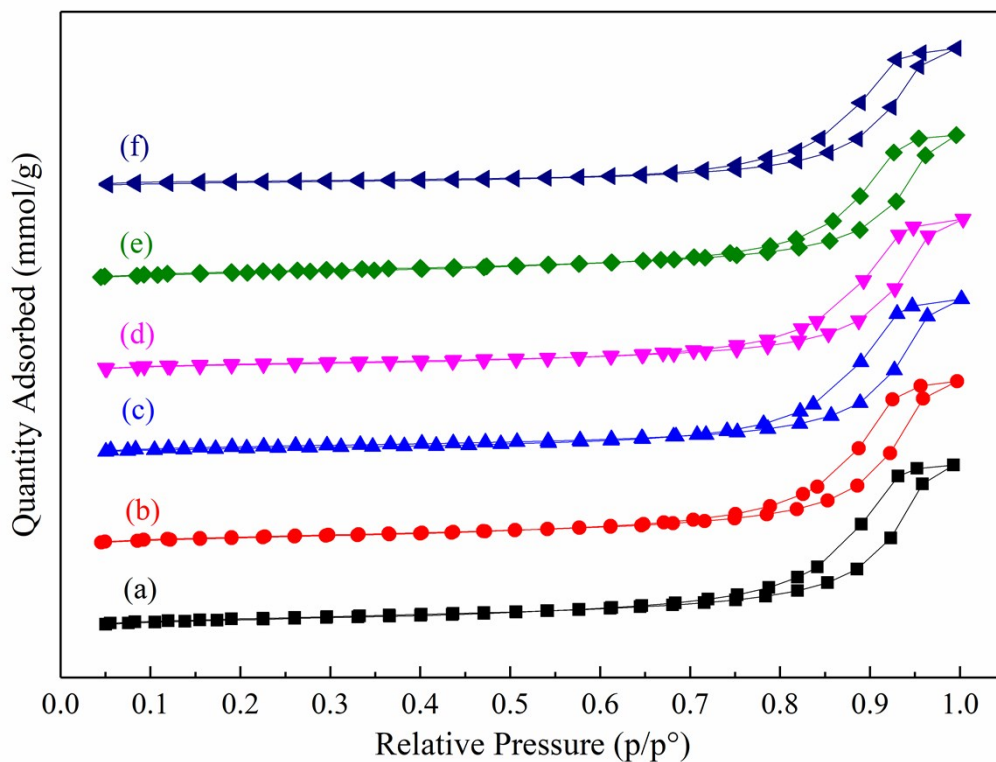

Fig. S3. N<sub>2</sub> adsorption and desorption isotherms of fresh catalysts: (a) Co/Si, (b) Co/NbSi-1, (c) Co/NbSi-2, (d) Co/NbSi-3, (e) Co/NbSi-4, and (f) Co/NbSi-5. The isotherms of catalysts exhibit classical irreversible IV type adsorption behavior, with a distinct H1 hysteresis loops. The condensation step on the isotherm at 0.5 to 0.95 indicated the presence of large mesoporous in the catalysts, which can provide channels for rapid large molecular transportation.

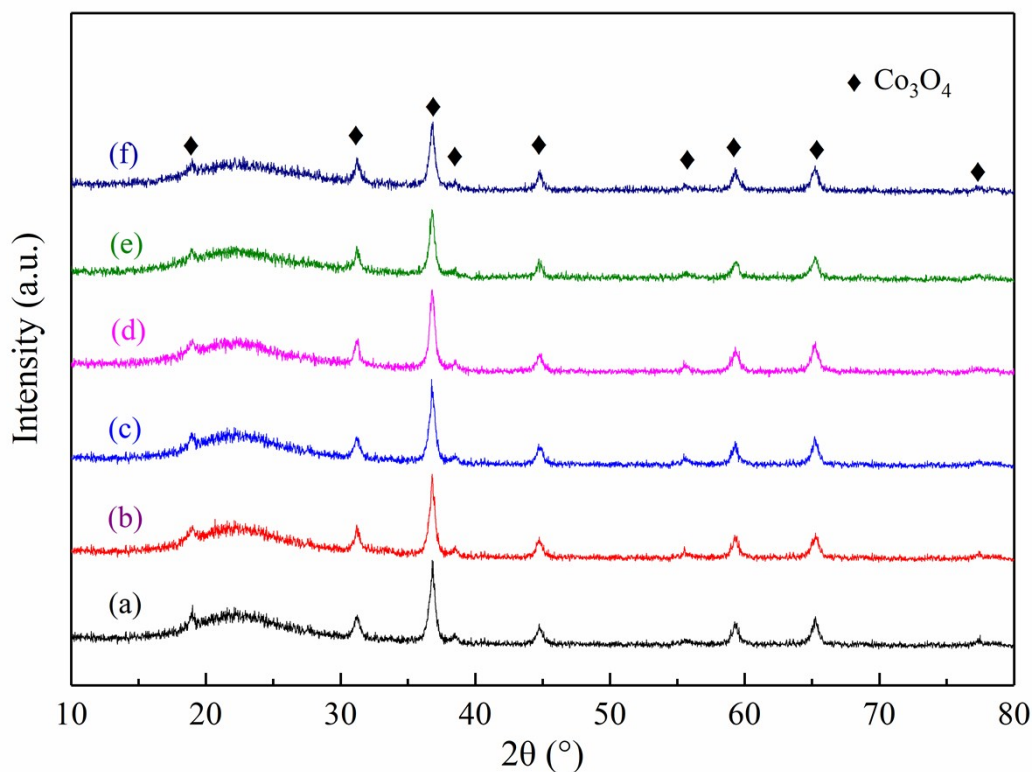

Fig. S4. XRD patterns of the calcined catalysts: (a) Co/Si, (b) Co/NbSi-1, (c) Co/NbSi-2, (d) Co/NbSi-3, (e) Co/NbSi-4, and (f) Co/NbSi-5. The diffraction peaks observed at  $2\theta = 19.0^\circ, 31.2^\circ, 36.8^\circ, 44.8^\circ, 55.6^\circ, 59.3^\circ,$  and  $65.2^\circ$  are in accordance with the corresponding crystal of spinel  $\text{Co}_3\text{O}_4$  crystalline phase<sup>1</sup>. Also, a broad peak at about  $22^\circ$  (from  $15^\circ$  to  $30^\circ$ ) for each sample indicates the presence of amorphous silica.<sup>2</sup> And no niobium species was significantly detected from XRD profiles, possibly owing to a low crystallinity of  $\text{NbO}_x$  at a low concentration. Therefore, no obvious peaks corresponding to  $\text{Nb}_2\text{O}_5$  was observed.

#### References

- 1 A. Y. Khodakov, *Catal. Today*, 2009, **144**, 251.
- 2 M. Nurunnabi and S. Q. Turn, *Fuel Process. Technol.*, 2015, **130**, 155.
